# Supplementary material
Source: PubMed Central journal article supplement (PMC4532598)
Supplement: NIHMS705252-supplement.pdf [file NIHMS705252-supplement.pdf]

## Supplemental materials

|              |                               |           |              |            |                         |          |       |
|--------------|-------------------------------|-----------|--------------|------------|-------------------------|----------|-------|
|              | 334                           |           | 356          | 363        | 369                     |          | 380   |
| <b>Human</b> | <b>DENFKRCFRDFCFPLKMRMERQ</b> | <b>ST</b> | <b>SRVRN</b> | <b>T</b>   | <b>VQDPAYLRDIDGMNKP</b> | <b>V</b> |       |
| <b>mouse</b> | -----                         | <b>I</b>  | -----        | <b>STN</b> | -----                   | <b>T</b> | ----- |
| <b>rat</b>   | -----                         | <b>I</b>  | -----        | <b>STN</b> | -----                   | <b>T</b> | ----- |

**Fig. S1. Sequence comparison of C-terminal domains of the human, rat and mouse KOPRs.** Amino acids that are phosphorylated following U50,488H treatment are shown in red.
